# Supplementary material for: The Population Structure of Glossina palpalis gambiensis from Island and Continental Locations in Coastal Guinea
Source: PLoS Negl Trop Dis. 2009 Mar 17;3(3):e392. doi: 10.1371/journal.pntd.0000392 (PMC2652410; doi:10.1371/journal.pntd.0000392)
Supplement: Appendix S1 — (0.03 MB DOC) [file pntd.0000392.s002.doc]

**Appendix 1**

Let *Nf* and *Nm* be the number of female and male adults respectively. Then, the effective population size is known as (e.g. (Hartl, Clark, 1989) page 86):

(1)

The total number of adults (census size) *Nc*=2*Nf* if a balanced sex ratio is assumed.

Let be the number of females sired by each most successful males and *x* the number of most successful males (other males do not mate successfully), then:

(2)

Combining (1) and (2) gives:

(3)

For all *nffec*>0 and all *Nc*>0 equation (3) reduces to:

(4)

Then if *Nc* is known, we can extract *nffec* as:

(5)

or if *nffec* is known, we can extract *Nc* as:

(6)
